# Supplementary material for: BCL-XL directly modulates RAS signalling to favour cancer cell stemness
Source: PubMed Central journal article supplement (PMC5654832; doi:10.1038/s41467-017-01079-1), 2017-10-24
Supplement: 41467_2017_1079_MOESM3_ESM.pdf [file 41467_2017_1079_MOESM3_ESM.pdf]

## **Description of Additional Supplementary Files**

File Name: Supplementary Data 1

Description: Ingenuity analysis of upstream regulators of RAS-induced BCL-XL-dependent target expression.

File Name: Supplementary Data 2

Description: A list of the proteins identified by mass spectrometry after IP-BCLXL in KRASV12-transformed cells only. Mass spectrometric analysis of protein lysates from KRASV12-transformed cells after IP-BCLXL was performed. BCL-XL itself was systematically identified in these immunoprecipitations. Negative control experiments were performed in parallel using lysates from the parental cells poorly expressing BCL-XL, with resulting immunoprecipitates harbouring no detectable BCL-XL. Proteins that were nevertheless identified in these negative control immunoprecipitates were classified as non-specific and they were taken off the short list of candidates shown in this table.
